# Supplementary material
Source: PubMed Central journal article supplement (PMC6402935)
Supplement: tpmd180672.SD1.pdf [file tpmd180672.SD1.pdf]

## Supplemental Table 1: subgroup analysis on time-lag of dengue hemorrhagic fever

### hospitalization

|                   | cIMT ( $\mu\text{m}$ , (SD)) | Mean difference ( $\mu\text{m}$ (95% confidence interval)) |                 |                          |                 |                          |                 |
|-------------------|------------------------------|------------------------------------------------------------|-----------------|--------------------------|-----------------|--------------------------|-----------------|
|                   |                              | Crude                                                      | <i>p</i> -value | Adjusted #1 <sup>a</sup> | <i>p</i> -value | Adjusted #2 <sup>b</sup> | <i>p</i> -value |
| Low time-lag      |                              |                                                            |                 |                          |                 |                          |                 |
| DHF+ <sup>c</sup> | 405.3 (44.3)                 | 14.3 (-23.3 –                                              | 0.45            | 7.2 (-35.9 –             | 0.74            | 10.5 (-29.0 –            | 0.60            |
| Controls          | 390.9 (58.8)                 | 51.9)                                                      |                 | 50.4)                    |                 | 50.0)                    |                 |
| High time-lag     |                              |                                                            |                 |                          |                 |                          |                 |
| DHF+ <sup>d</sup> | 459.0 (73.8)                 | 68.1 (26.6 –                                               | <0.01**         | 71.0 (24.2 –             | <0.01**         | 57.6 (6.9 -              | 0.03*           |
| Controls          | 390.9 (58.8)                 | 109.5)                                                     |                 | 117.7)                   |                 | 108.2)                   |                 |

<sup>a</sup> Adjusted model corrected for age, gender, BMI *z*-score and combined educational years of parents as a proxy for socioeconomic status. Age is included in this model as age is not similar between cases and controls in this sub-group analysis, contrary to the full analysis.

<sup>b</sup> Adjusted model, similar to model 1, additional correction for systolic blood pressure.

<sup>c</sup> Including only the cases with a time-lag (years) between hospitalization and current measurements that is lower than the meridian. *n* = 12, mean and (range) time-lag is 4.2 (0.8 – 6.8) years.

<sup>d</sup> Including only the cases with a time-lag (years) between hospitalization and current measurements that is higher than the meridian. *n* = 13, mean and (range) time-lag is 12.2 (9.3 – 16.5) years.
